# Supplementary material
Source: publisher figshare collection journal article supplement (https://frontiersin.figshare.com/ndownloader/files/23927063)

# Supplementary Figure S1

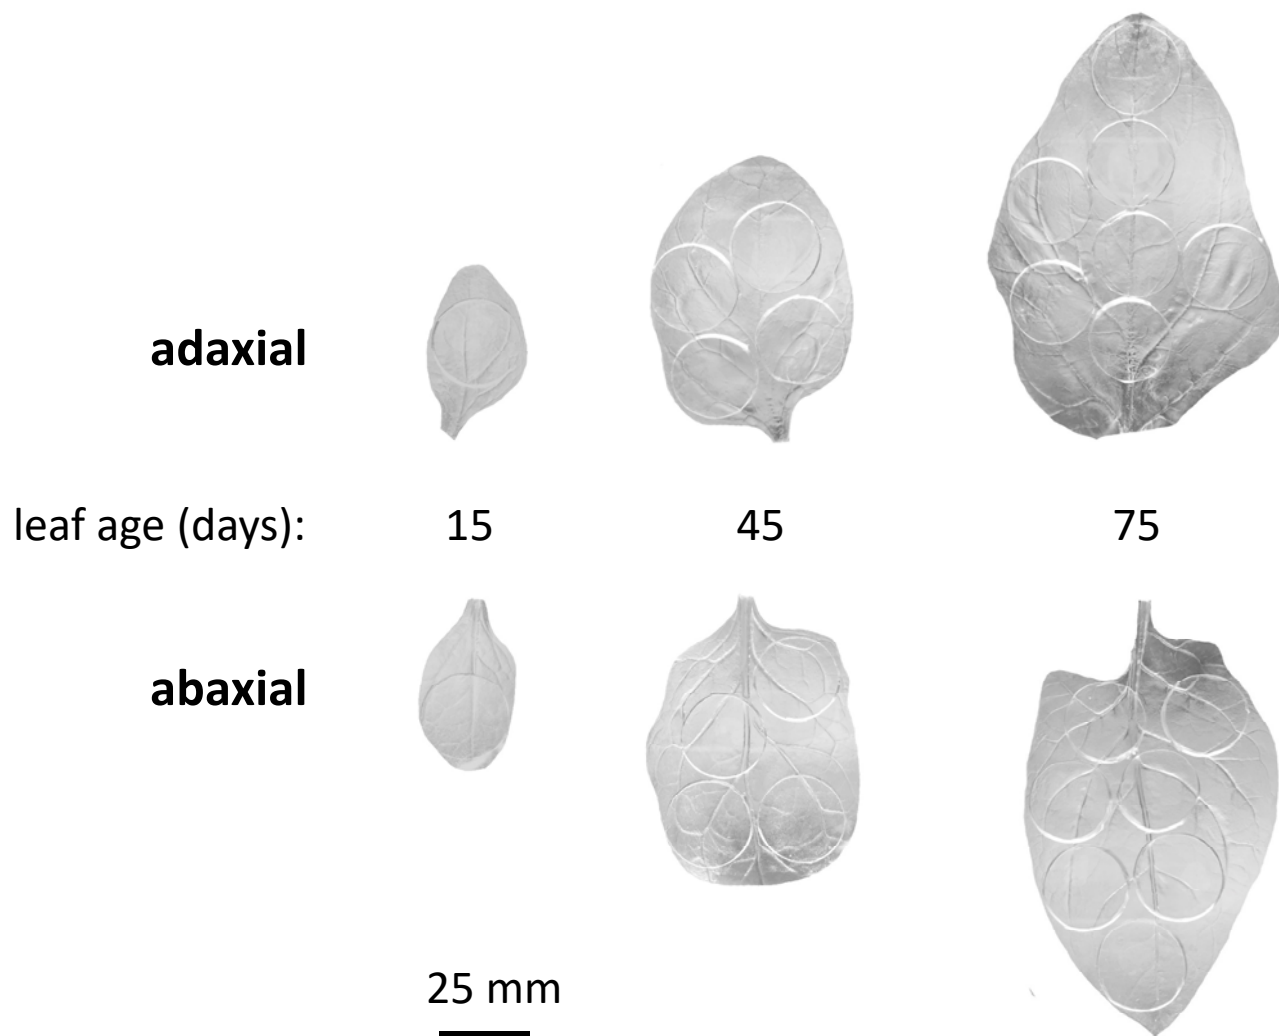

## Supplementary Figure S2

**A**

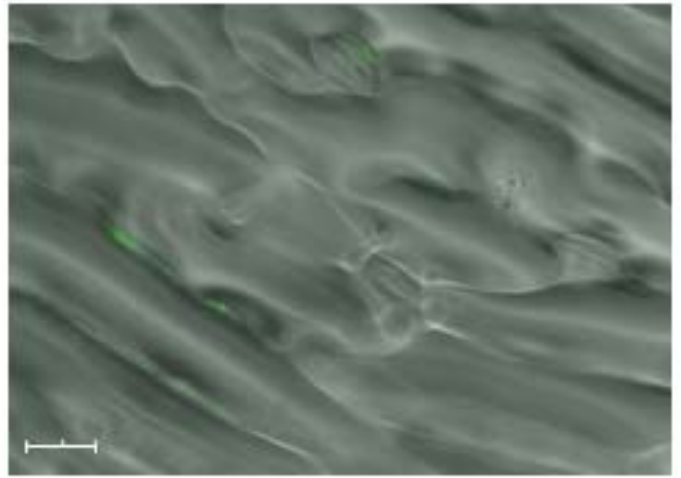

**B**

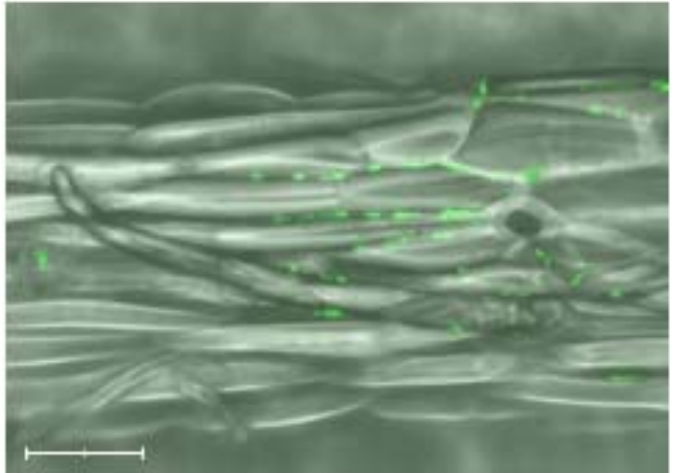

**C**

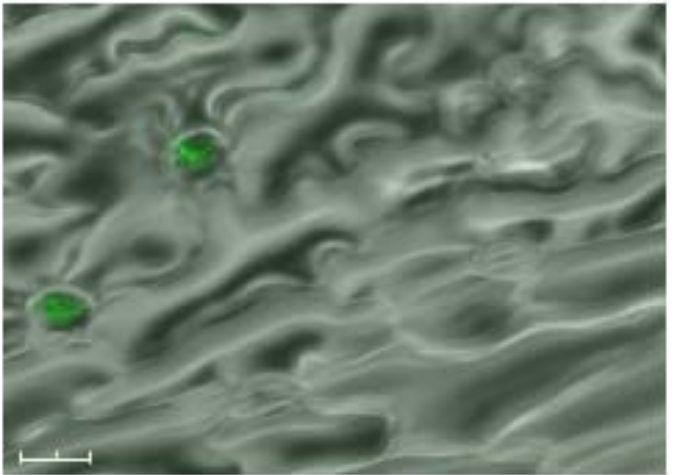

**D**

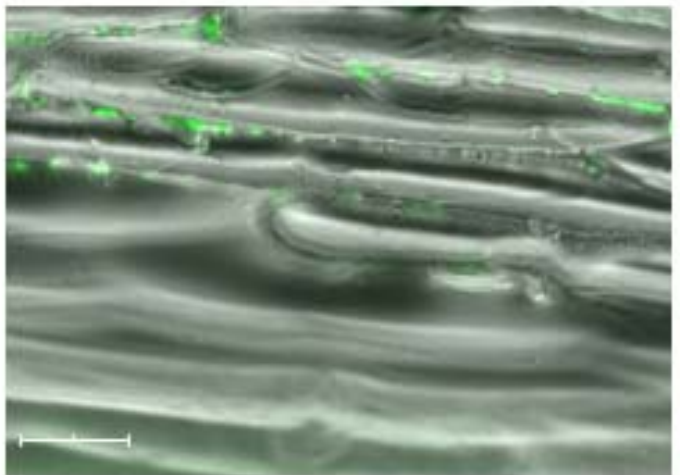

Supplement: Supplementary file [file 23927063]
